# Supplementary material for: Conformational behaviour, photochemistry and flash vacuum pyrolysis of a 2-(1H-tetrazol-1-yl)thiophene
Source: Royal Society of Chemistry journal article supplement (doi:10.1039/c7nj02775c), 2017-01-01
Supplement: c7nj02775c1.pdf [file c7nj02775c1.pdf]

## Supplementary Information

### Conformational Behaviour, Photochemistry and Flash Vacuum Pyrolysis of a 2-(1*H*-Tetrazol-1-yl)thiophene

Maria I. L. Soares,<sup>a,\*</sup> Cláudio M. Nunes,<sup>a</sup> Clara S. B. Gomes,<sup>b</sup>

Teresa M. V. D. Pinho e Melo,<sup>a</sup> Rui Fausto<sup>a</sup>

<sup>a</sup> CQC, Department of Chemistry, University of Coimbra, 3004-535 Coimbra, Portugal

<sup>b</sup> Centro de Química Estrutural, Instituto Superior Técnico, Universidade de Lisboa, 1049-001 Lisboa, Portugal

### Table of Contents

|                                                                                                                                                                                                                                                                                      |     |
|--------------------------------------------------------------------------------------------------------------------------------------------------------------------------------------------------------------------------------------------------------------------------------------|-----|
| <b>Figure S1:</b> Optimized structure of the theoretically predicted conformer <b>15-III</b> calculated at the B3LYP/6-311++G(d,p) level.                                                                                                                                            | S2  |
| <b>Table S1:</b> Experimental IR spectrum, B3LYP/6-311++G(d,p) calculated vibrational frequencies and absolute IR intensities for 2-(1 <i>H</i> -tetrazol-1-yl)thiophene <b>15</b>                                                                                                   | S3  |
| <b>Figure S2:</b> Experimental UV-Vis spectrum of 2-(1 <i>H</i> -tetrazol-1-yl)thiophene <b>15</b>                                                                                                                                                                                   | S4  |
| <b>Figure S3:</b> IR spectra of thiophen-2-ylcarbodiimide <b>17</b> conformers simulated at the B3LYP/6-311++G(d,p) level                                                                                                                                                            | S5  |
| <b>Figure S4:</b> Experimental difference IR spectrum obtained from the spectrum after irradiation of matrix-isolated tetrazole <b>15</b> “minus“ the spectrum of the sample before irradiation and IR spectra of carbodiimide conformers simulated at the B3LYP/6-311++G(d,p) level | S6  |
| <b>Figure S5:</b> <sup>1</sup> H NMR spectrum of compound <b>18</b>                                                                                                                                                                                                                  | S7  |
| <b>Figure S6:</b> <sup>13</sup> C NMR spectrum of compound <b>18</b>                                                                                                                                                                                                                 | S7  |
| <b>Figure S7:</b> <sup>1</sup> H NMR spectrum of compound <b>19</b>                                                                                                                                                                                                                  | S8  |
| <b>Figure S8:</b> <sup>13</sup> C NMR spectrum of compound <b>19</b>                                                                                                                                                                                                                 | S8  |
| <b>Table S2:</b> Crystallographic data for compounds <b>15</b> and <b>19</b>                                                                                                                                                                                                         | S9  |
| Cartesian coordinates, energies and IR spectra from B3LYP calculations for <b>15</b> and <b>17</b>                                                                                                                                                                                   | S10 |

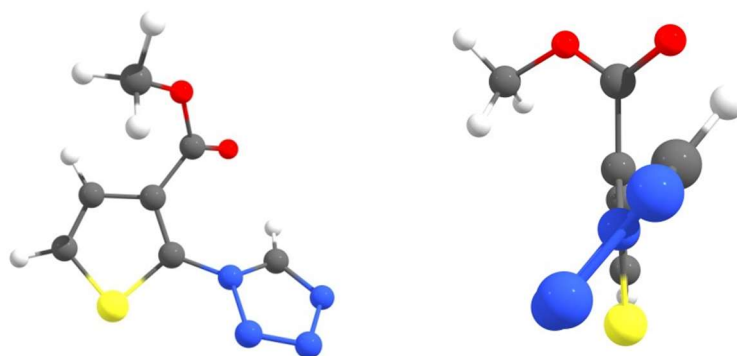

**15-III**  
 $E_{\text{rZPE}} = 42.7 \text{ kJ mol}^{-1}$

**Figure S1:** Optimized structure of the theoretically predicted conformer **15-III** calculated at the B3LYP/6-311++G(d,p) level with relative zero-point-corrected energy [ $\text{kJ mol}^{-1}$ ]. Calculations were carried out in order to find higher energy isomers of compound **15** having *trans* orientation concerning the O=C–O–C(H<sub>3</sub>) dihedral ( $\sim 180^\circ$ ). Theoretical calculations allowed us to find a single conformation corresponding to a minimum. As mentioned in the manuscript, its relative energy is above  $40 \text{ kJ mol}^{-1}$  and therefore not significant from an experimental point of view.

**Table S1:** Experimental IR spectrum (Ar matrix, 16 K), B3LYP/6-311++G(d,p) calculated vibrational frequencies ( $\tilde{\nu}$  [ $\text{cm}^{-1}$ ], absolute IR intensities ( $A^{th}$  [ $\text{km mol}^{-1}$ ]) for 2-(1*H*-tetrazol-1-yl)thiophene **15**.

| Ar matrix <sup>[a]</sup> |          |   | Calculated <sup>[b]</sup> |          |               |          |
|--------------------------|----------|---|---------------------------|----------|---------------|----------|
| <b>15</b>                |          |   | <b>15-I</b>               |          | <b>15-II</b>  |          |
| $\tilde{\nu}$            | <i>I</i> |   | $\tilde{\nu}$             | $A^{th}$ | $\tilde{\nu}$ | $A^{th}$ |
| 704                      | w        | { | 704                       | 8.7      | 708           | 12.5     |
| 712                      | m        | { | 708                       | 15.8     | 712           | 13.6     |
| 963                      | br       | { | 950                       | 15.6     | 950           | 10.9     |
| 983                      | w        |   |                           |          | 976           | 6.2      |
| 995                      | w        |   | 984                       | 9.6      |               |          |
| 995                      | w        |   |                           |          | 986           | 13.3     |
| 1016                     | m        |   | 1003                      | 25.2     |               |          |
| 1076                     | s        | { | 1067                      | 17.2     | 1068          | 9.4      |
| 1144                     | br       | { | 1136                      | 21.4     | 1136          | 35.6     |
| 1204                     | m        |   | 1193                      | 63.6     |               |          |
| 1186                     | m        |   |                           |          | 1188          | 13.1     |
| 1263                     | vs       |   | 1254                      | 107      |               |          |
| 1270                     | s        |   |                           |          | 1261          | 98.6     |
| 1295                     | m        |   | 1321                      | 23.6     |               |          |
| 1300                     | m        |   |                           |          | 1314          | 8.7      |
| 1405                     | w        |   |                           |          | 1401          | 29.6     |
| 1408                     | m        |   | 1400                      | 18.2     |               |          |
| 1444                     | m        |   | 1443                      | 9.3      |               |          |
| 1446                     | m        |   |                           |          | 1444          | 14.1     |
| 1482                     | br       | { | 1478                      | 16.5     | 1476          | 14.2     |
| 1554                     | m        |   | 1546                      | 36.5     |               |          |
| 1560                     | m        |   |                           |          | 1554          | 15.2     |
| 1729                     | vs       |   | 1722                      | 84.2     |               |          |
| 1738                     | s        |   |                           |          | 1732          | 114.0    |
| 2966                     | br       | { | 2994                      | 9.9      | 2996          | 8.8      |

[a] Only bands in the 3300-600  $\text{cm}^{-1}$  region having calculated intensities above 5  $\text{km mol}^{-1}$  (for both conformers) are included. Experimental intensities are presented in qualitative terms: vs = very strong, s = strong, m = medium, w = weak and br = broad; [b] Scaled B3LYP/6-311++G(d,p) frequencies.

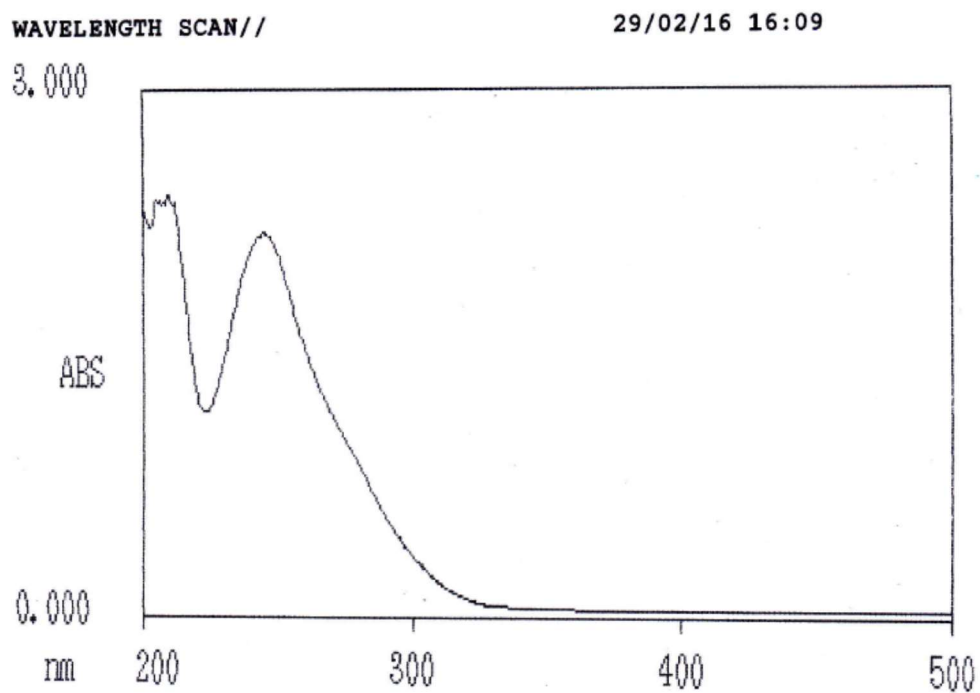

**Figure S2:** Experimental UV-Vis spectrum of 2-(1*H*-tetrazol-1-yl)thiophene **15** in acetonitrile solution.

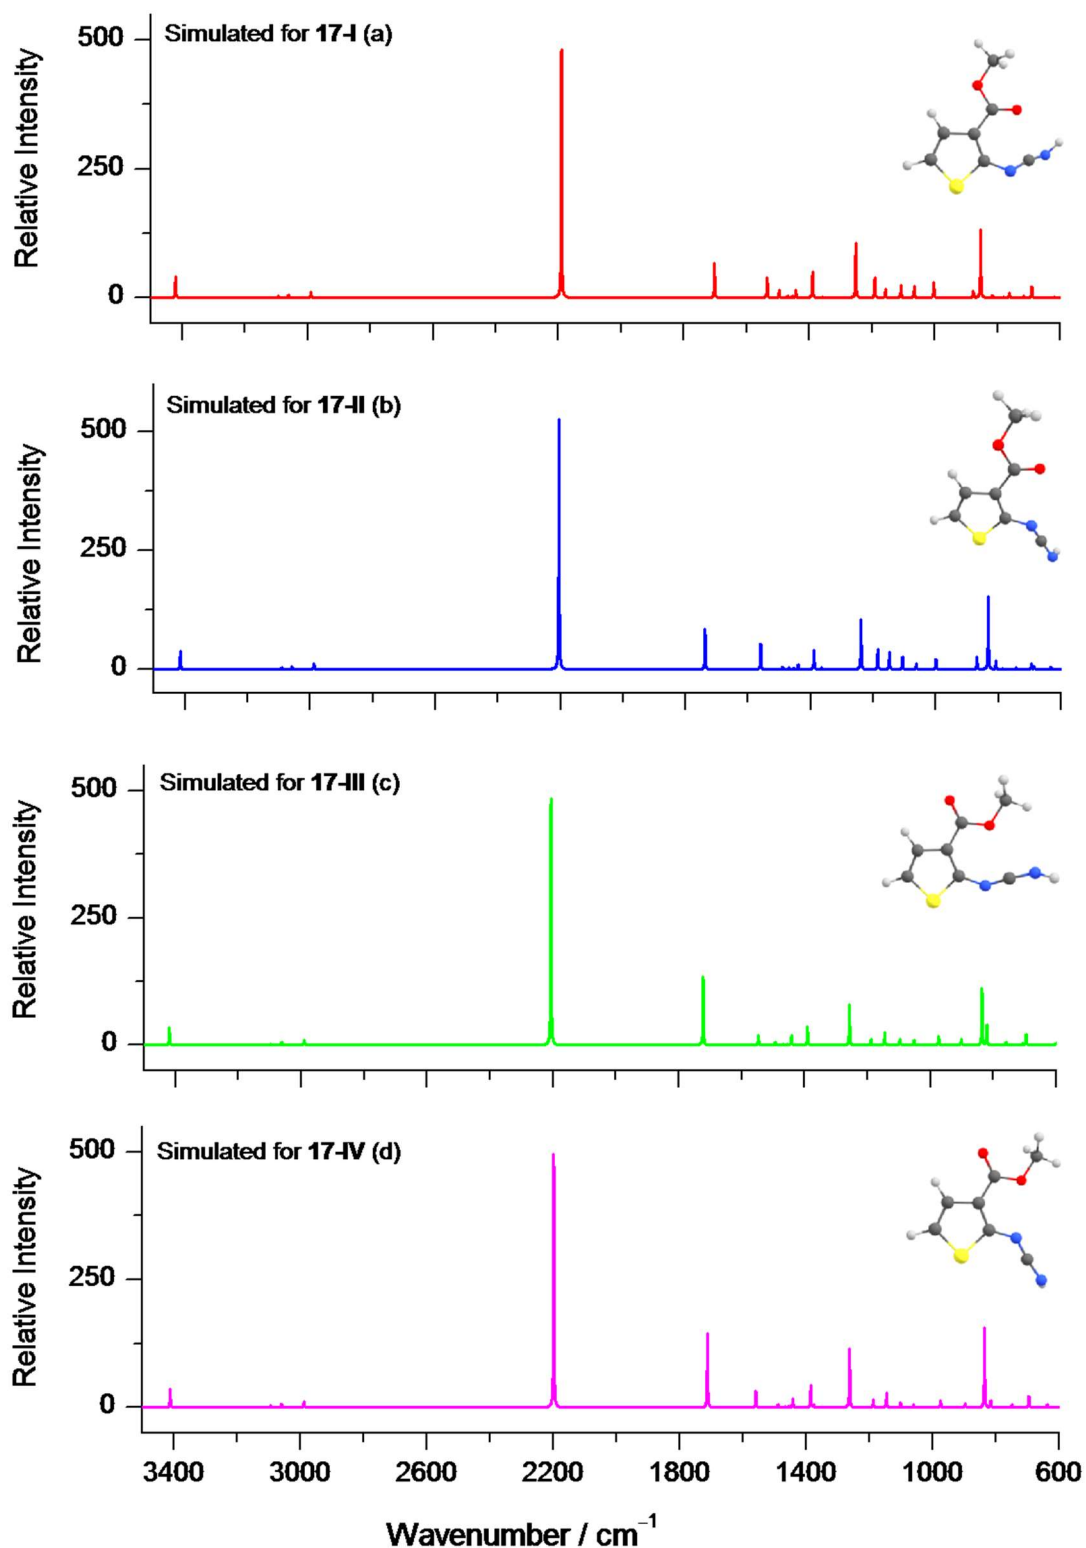

**Figure S3:** IR spectra of thiophen-2-ylcarbodiimide **17** conformers simulated at the B3LYP/6-311++G(d,p) level: (a) conformer **17-I**; (b) conformer **17-II**; (c) conformer **17-III**; (d) conformer **17-IV**.

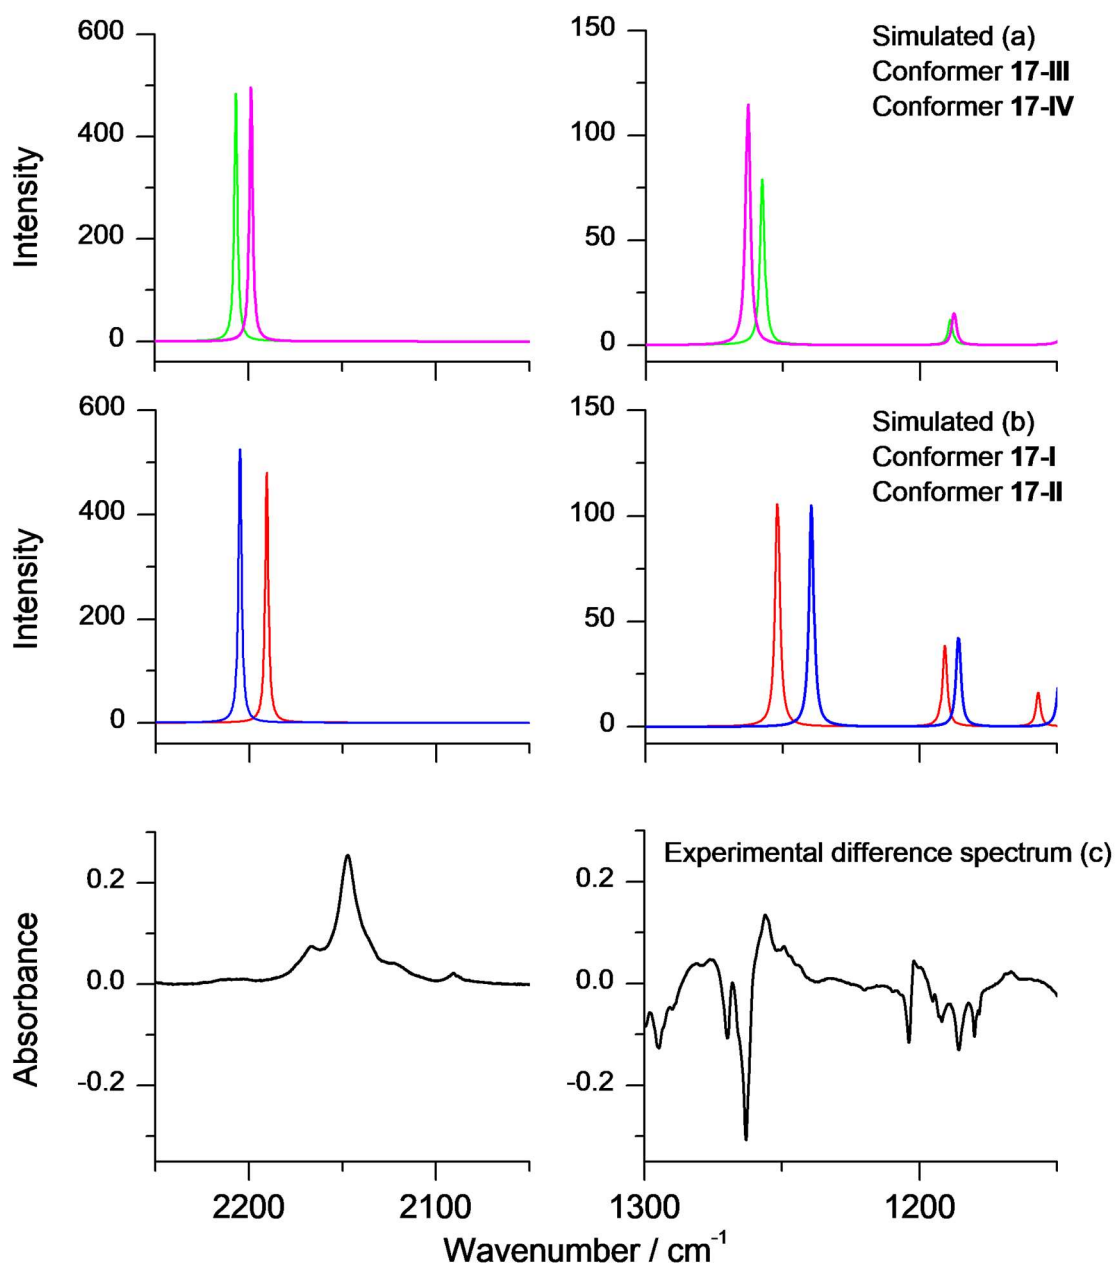

**Figure S4:** (a) B3LYP/6-311++G(d,p) simulated IR spectra for conformers **17-III** and **17-IV**; (b) B3LYP/6-311++G(d,p) simulated IR spectra for conformers **17-I** and **17-II**. The calculated spectra were simulated using Lorentzian functions centered at the calculated frequency scaled by 0.95, above 3400 cm<sup>-1</sup>, and 0.98, below 3400 cm<sup>-1</sup>, and with full-width-at-half-maximum (fwhm) equal to 2 cm<sup>-1</sup>; (c) Experimental difference IR obtained from the spectrum after irradiation of matrix-isolated tetrazole **15** at 245 nm (~22 min, ~5 mW) “minus” the spectrum of the sample before irradiation. The negative bands correspond to tetrazole **15** and positive bands are due to the photoproduct.

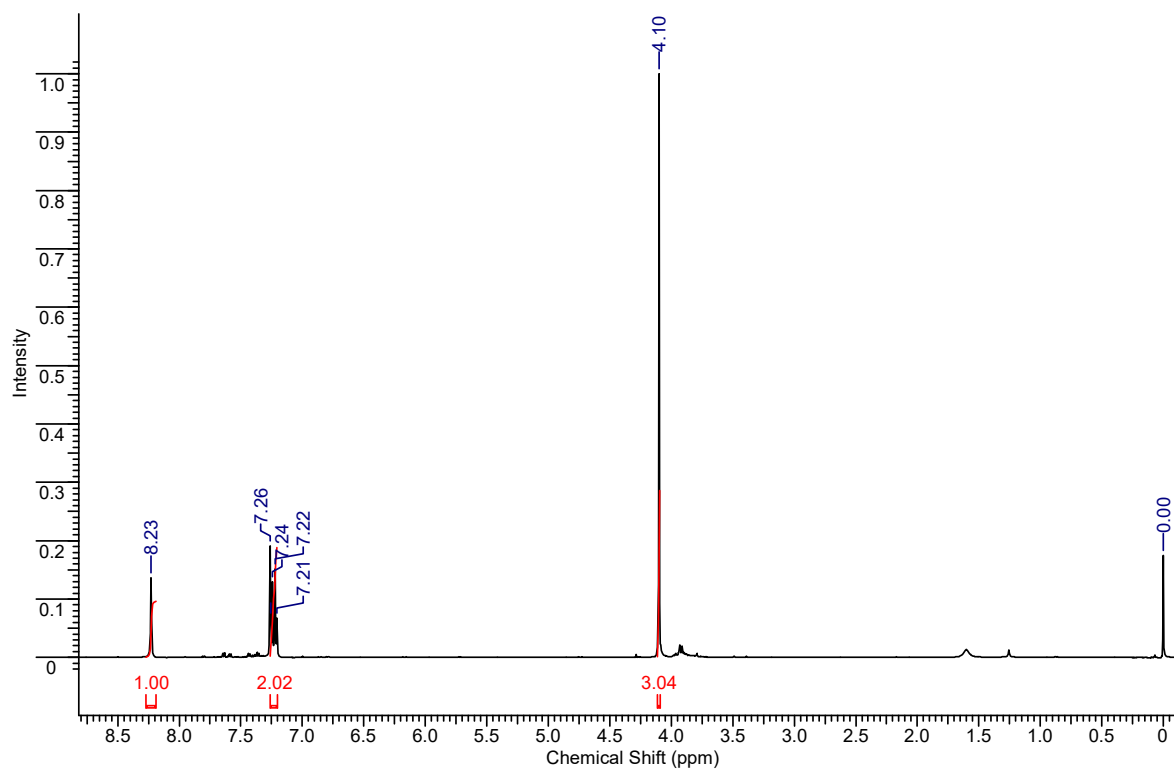

Figure S5:  $^1\text{H}$  NMR spectrum of compound **18**.

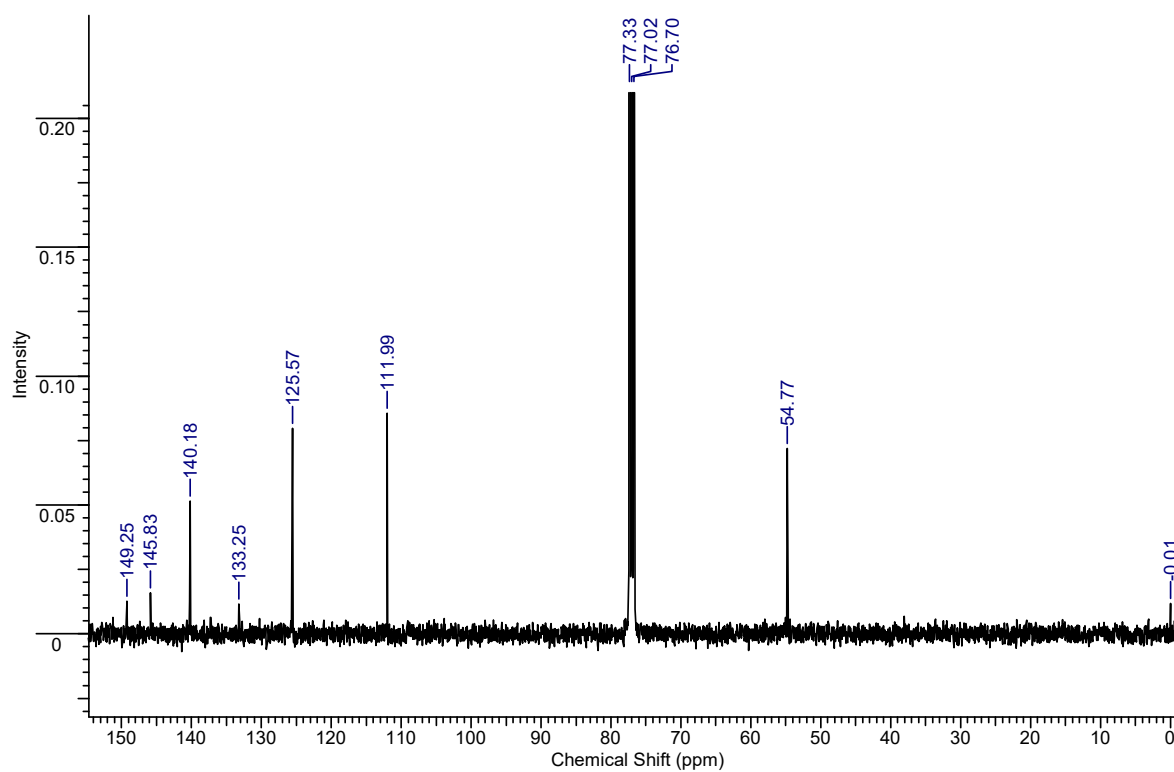

Figure S6:  $^{13}\text{C}$  NMR spectrum of compound **18**.

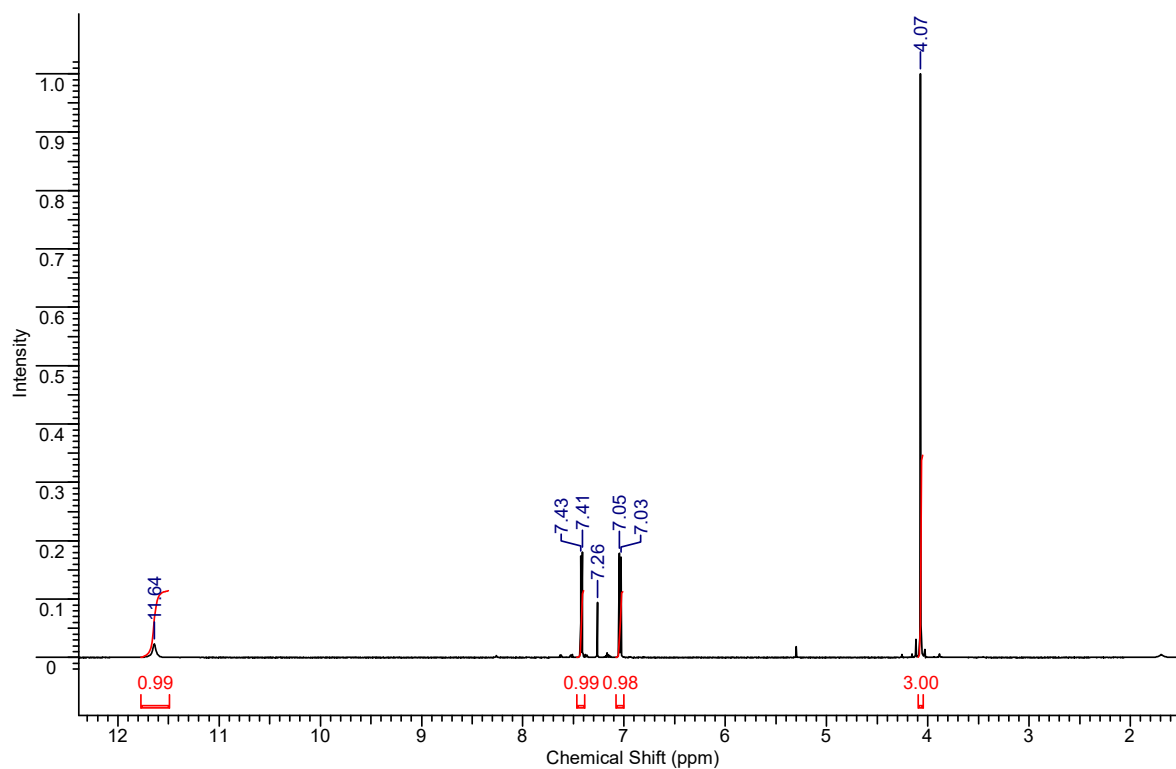

Figure S7:  $^1\text{H}$  NMR spectrum of compound 19.

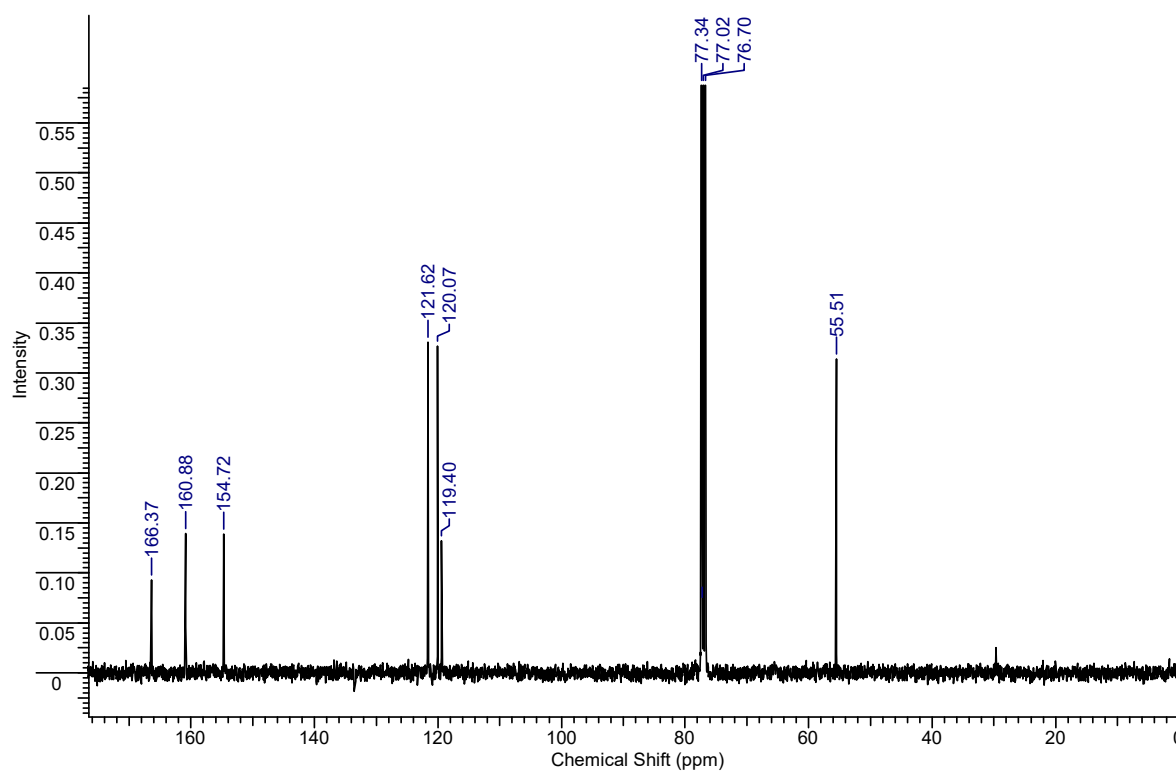

Figure S8:  $^{13}\text{C}$  NMR spectrum of compound 19.



**Table S2:** Crystallographic data for compounds **15** and **19**.

|                                      | <b>15</b>                                                     | <b>19</b>                                                     |
|--------------------------------------|---------------------------------------------------------------|---------------------------------------------------------------|
| Formula                              | C <sub>7</sub> H <sub>6</sub> N <sub>4</sub> O <sub>2</sub> S | C <sub>7</sub> H <sub>6</sub> N <sub>2</sub> O <sub>2</sub> S |
| <i>M</i>                             | 210.22                                                        | 182.20                                                        |
| $\lambda$ (Å)                        | 0.71073                                                       | 0.71073                                                       |
| <i>T</i> (K)                         | 293(2)                                                        | 150(2)                                                        |
| crystal system                       | Monoclinic                                                    | Monoclinic                                                    |
| space group                          | <i>P</i> 2 <sub>1</sub> /c                                    | <i>P</i> 2 <sub>1</sub> /c                                    |
| <i>a</i> (Å)                         | 3.9245(5)                                                     | 8.454(4)                                                      |
| <i>b</i> (Å)                         | 18.054(2)                                                     | 12.125(6)                                                     |
| <i>c</i> (Å)                         | 12.6455(15)                                                   | 7.206(3)                                                      |
| $\alpha$ (°)                         | 90                                                            | 90                                                            |
| $\beta$ (°)                          | 98.936(8)                                                     | 91.66(2)                                                      |
| $\gamma$ (°)                         | 90                                                            | 90                                                            |
| <i>V</i> (Å <sup>3</sup> )           | 885.09(19)                                                    | 738.4(6)                                                      |
| <i>Z</i>                             | 4                                                             | 4                                                             |
| $\rho_{calc}$ (g.cm <sup>-3</sup> )  | 1.578                                                         | 1.639                                                         |
| $\mu$ (mm <sup>-1</sup> )            | 0.343                                                         | 0.390                                                         |
| Crystal size                         | 0.20×0.20×0.30                                                | 0.20×0.10×0.08                                                |
| Crystal colour                       | Colourless                                                    | Colourless                                                    |
| Crystal description                  | Prism                                                         | Plate                                                         |
| $\theta_{max}$ (°)                   | 25.681                                                        | 25.772                                                        |
| total data                           | 5591                                                          | 2802                                                          |
| unique data                          | 1710                                                          | 1394                                                          |
| <i>R</i> <sub>int</sub>              | 0.0404                                                        | 0.0492                                                        |
| <i>R</i> [ <i>I</i> >2σ( <i>I</i> )] | 0.0347                                                        | 0.0530                                                        |
| <i>R</i> <sub>w</sub>                | 0.0909                                                        | 0.1132                                                        |
| Goodness of fit                      | 1.026                                                         | 1.017                                                         |
| $\rho_{min}$                         | -0.230                                                        | -0.341                                                        |
| $\rho_{max}$                         | 0.204                                                         | 0.420                                                         |

## B3LYP/6-311++G(d,p) calculations

### Tetrazole 15:

#### Conformer 15-I

Energy = -1038.1302489 Ha, ZPE = 0.1359625 Ha

|   |              |              |              |
|---|--------------|--------------|--------------|
| C | -0.492805000 | 0.594609000  | -0.052650000 |
| C | 0.890053000  | 0.555676000  | -0.072554000 |
| C | 1.449952000  | 1.874752000  | -0.103075000 |
| C | 0.511616000  | 2.857746000  | -0.104560000 |
| S | -1.098917000 | 2.222961000  | -0.064286000 |
| H | 2.514680000  | 2.052861000  | -0.115211000 |
| H | 0.660822000  | 3.926478000  | -0.110873000 |
| N | -1.441676000 | -0.438610000 | -0.001239000 |
| C | -1.521394000 | -1.660963000 | -0.589570000 |
| H | -0.728582000 | -2.103359000 | -1.163099000 |
| N | -2.628194000 | -0.231558000 | 0.657817000  |
| N | -3.338993000 | -1.277348000 | 0.466413000  |
| N | -2.683950000 | -2.191907000 | -0.305103000 |
| C | 1.716612000  | -0.670287000 | -0.032427000 |
| O | 1.311648000  | -1.802360000 | -0.186118000 |
| O | 3.010947000  | -0.378750000 | 0.198750000  |
| C | 3.910861000  | -1.504254000 | 0.252650000  |
| H | 3.904806000  | -2.040542000 | -0.696881000 |
| H | 4.891670000  | -1.077547000 | 0.448118000  |
| H | 3.618841000  | -2.184105000 | 1.053375000  |

#### Conformer 15-II

Energy = -1038.1289100 Ha, ZPE = 0.1358529 Ha

|   |              |              |              |
|---|--------------|--------------|--------------|
| C | 0.041841000  | -0.831294000 | 0.043052000  |
| C | 1.250906000  | -0.165013000 | 0.029848000  |
| C | 2.352190000  | -1.077176000 | 0.042152000  |
| C | 1.969280000  | -2.382652000 | 0.054435000  |
| S | 0.247333000  | -2.555769000 | 0.060927000  |
| H | 3.377975000  | -0.738220000 | 0.025358000  |
| H | 2.592698000  | -3.263475000 | 0.044947000  |
| N | -1.266543000 | -0.317542000 | 0.046512000  |
| C | -1.899746000 | 0.485303000  | 0.932711000  |
| H | -1.431953000 | 0.903316000  | 1.806679000  |
| N | -2.175443000 | -0.650135000 | -0.922542000 |
| N | -3.268262000 | -0.059729000 | -0.609096000 |
| N | -3.136800000 | 0.660358000  | 0.543694000  |
| C | 1.507656000  | 1.296069000  | -0.049188000 |
| O | 2.616316000  | 1.766554000  | -0.148788000 |
| O | 0.383406000  | 2.035123000  | -0.006504000 |
| C | 0.557439000  | 3.462462000  | -0.137995000 |
| H | 1.024474000  | 3.697279000  | -1.094633000 |
| H | -0.445549000 | 3.879134000  | -0.087224000 |
| H | 1.179183000  | 3.844000000  | 0.672310000  |

| $\tilde{\nu}$ | $A$   | $\tilde{\nu}$ | $A$  | $\tilde{\nu}$ | $A$   | $\tilde{\nu}$ | $A$  |
|---------------|-------|---------------|------|---------------|-------|---------------|------|
| 3321          | 14.4  | 960           | 8.9  | 3296          | 3.0   | 957           | 3.9  |
| 3251          | 0.8   | 915           | 1.8  | 3248          | 1.3   | 928           | 3.5  |
| 3233          | 1.6   | 901           | 9.1  | 3227          | 2.9   | 922           | 16.1 |
| 3163          | 11.7  | 869           | 18.2 | 3165          | 7.1   | 868           | 11.4 |
| 3131          | 14.7  | 836           | 16.6 | 3133          | 13.2  | 840           | 14.0 |
| 3055          | 31.5  | 799           | 2.4  | 3057          | 27.6  | 803           | 0.8  |
| 1758          | 264.9 | 774           | 4.7  | 1768          | 370.5 | 774           | 10.4 |
| 1578          | 114.8 | 723           | 48.3 | 1586          | 48.1  | 726           | 39.0 |
| 1507          | 53.5  | 719           | 24.5 | 1506          | 46.5  | 723           | 35.6 |
| 1497          | 14.1  | 681           | 0.2  | 1497          | 6.8   | 688           | 4.1  |
| 1483          | 11.1  | 656           | 9.9  | 1484          | 13.2  | 659           | 3.8  |
| 1482          | 8.3   | 602           | 2.2  | 1484          | 7.1   | 606           | 1.0  |
| 1473          | 30.0  | 529           | 4.7  | 1474          | 44.7  | 528           | 3.5  |
| 1429          | 58.6  | 518           | 3.1  | 1430          | 97.8  | 510           | 1.0  |
| 1386          | 15.3  | 411           | 1.6  | 1402          | 12.0  | 402           | 1.1  |
| 1348          | 74.1  | 364           | 12.6 | 1340          | 27.2  | 370           | 11.0 |
| 1279          | 346.0 | 334           | 6.0  | 1287          | 312.1 | 349           | 7.1  |
| 1222          | 14.0  | 322           | 0.5  | 1220          | 13.1  | 318           | 3.3  |
| 1217          | 199.9 | 287           | 5.2  | 1213          | 41.3  | 281           | 1.9  |
| 1195          | 8.7   | 207           | 6.0  | 1187          | 17.4  | 203           | 5.2  |
| 1171          | 1.0   | 162           | 5.0  | 1171          | 1.3   | 155           | 1.6  |
| 1159          | 71.1  | 147           | 0.3  | 1160          | 111.7 | 138           | 0.2  |
| 1117          | 10.5  | 134           | 0.1  | 1111          | 15.8  | 126           | 1.1  |
| 1089          | 54.3  | 111           | 0.4  | 1091          | 30.9  | 100           | 0.6  |
| 1023          | 80.8  | 98            | 1.7  | 1006          | 45.1  | 89            | 0.3  |
| 1005          | 30.0  | 45            | 3.9  | 996           | 19.1  | 36            | 3.5  |
| 970           | 48.9  | 34            | 2.2  | 971           | 34.9  | 27            | 7.3  |

### Conformer 15-III

Energy = -1038.1134503 Ha, ZPE = 0.135447 Ha

|   |              |              |              |
|---|--------------|--------------|--------------|
| C | -0.234689000 | 0.624626000  | -0.127802000 |
| C | 1.039020000  | 0.138099000  | -0.317290000 |
| C | 1.993911000  | 1.198669000  | -0.426967000 |
| C | 1.435398000  | 2.435680000  | -0.308576000 |
| S | -0.273126000 | 2.361724000  | -0.053572000 |
| H | 3.047326000  | 1.036888000  | -0.608765000 |
| H | 1.926739000  | 3.395661000  | -0.349787000 |
| N | -1.436975000 | -0.083508000 | 0.023065000  |
| C | -1.973528000 | -1.123168000 | -0.668942000 |
| H | -1.462005000 | -1.636068000 | -1.465098000 |
| N | -2.361452000 | 0.303338000  | 0.958585000  |
| N | -3.367402000 | -0.476291000 | 0.816325000  |
| N | -3.162689000 | -1.380228000 | -0.183525000 |
| C | 1.372979000  | -1.310781000 | -0.483552000 |
| O | 0.817420000  | -2.012474000 | -1.291923000 |
| O | 2.357147000  | -1.830276000 | 0.276619000  |
| C | 2.841286000  | -1.175950000 | 1.465953000  |
| H | 3.652508000  | -0.488058000 | 1.223524000  |
| H | 2.041694000  | -0.644319000 | 1.982665000  |
| H | 3.220577000  | -1.975912000 | 2.098946000  |

## Carbodiimide 17:

### Conformer 17-I

Energy = -928.6456244 Ha, ZPE = 0.1232524 Ha

|   |              |              |              |
|---|--------------|--------------|--------------|
| C | 1.090988000  | 0.301438000  | 0.105981000  |
| C | 0.068683000  | -0.631017000 | -0.014813000 |
| C | 0.572293000  | -1.965709000 | -0.166069000 |
| C | 1.928439000  | -2.035884000 | -0.153242000 |
| S | 2.654885000  | -0.469315000 | 0.055259000  |
| H | -0.074631000 | -2.823343000 | -0.278410000 |
| H | 2.556252000  | -2.906990000 | -0.257028000 |
| N | 1.068522000  | 1.655183000  | 0.319642000  |
| C | 0.281352000  | 2.527094000  | -0.024404000 |
| N | -0.291814000 | 3.523723000  | -0.412279000 |
| H | -1.189958000 | 3.786425000  | -0.025987000 |
| C | -1.355631000 | -0.281427000 | 0.061057000  |
| O | -1.802265000 | 0.838905000  | 0.216095000  |
| O | -2.147788000 | -1.370942000 | -0.053251000 |
| C | -3.564429000 | -1.129470000 | 0.014181000  |
| H | -4.029082000 | -2.106313000 | -0.100195000 |
| H | -3.876249000 | -0.459349000 | -0.788090000 |
| H | -3.831192000 | -0.687583000 | 0.975136000  |

### Conformer 17-II

Energy = -928.6408148 Ha, ZPE = 0.1228882 Ha

|   |              |              |              |
|---|--------------|--------------|--------------|
| C | 0.816636000  | 0.117024000  | -0.049682000 |
| C | -0.527104000 | 0.441391000  | 0.007704000  |
| C | -0.740993000 | 1.856887000  | 0.068616000  |
| C | 0.409133000  | 2.580458000  | 0.058019000  |
| S | 1.814624000  | 1.561812000  | -0.031817000 |
| H | -1.726377000 | 2.295679000  | 0.118691000  |
| H | 0.528925000  | 3.652231000  | 0.092910000  |
| N | 1.352164000  | -1.137449000 | -0.150775000 |
| C | 2.460377000  | -1.615710000 | -0.000291000 |
| N | 3.547262000  | -2.167948000 | -0.027986000 |
| H | 3.929176000  | -2.633893000 | 0.785382000  |
| C | -1.610868000 | -0.564606000 | 0.020742000  |
| O | -1.474149000 | -1.763153000 | 0.080250000  |
| O | -2.827274000 | 0.037469000  | -0.038263000 |
| C | -3.959761000 | -0.848237000 | -0.023507000 |
| H | -4.833451000 | -0.202431000 | -0.080681000 |
| H | -3.975005000 | -1.434728000 | 0.896405000  |
| H | -3.926379000 | -1.525835000 | -0.877800000 |

| $\tilde{\nu}$ | $A$    | $\tilde{\nu}$ | $A$   |
|---------------|--------|---------------|-------|
| 3602          | 129.5  | 871           | 414.6 |
| 3250          | 0.4    | 832           | 10.9  |
| 3227          | 1.5    | 796           | 6.4   |
| 3156          | 14.0   | 777           | 30.1  |
| 3123          | 18.5   | 731           | 11.4  |
| 3051          | 37.1   | 704           | 65.9  |
| 2235          | 1516.3 | 631           | 8.0   |
| 1737          | 210.5  | 591           | 2.5   |
| 1566          | 124.9  | 559           | 14.6  |
| 1527          | 45.3   | 527           | 53.5  |
| 1498          | 10.2   | 504           | 10.6  |
| 1483          | 9.7    | 432           | 23.0  |
| 1472          | 45.8   | 427           | 34.2  |
| 1418          | 160.8  | 374           | 10.0  |
| 1385          | 3.5    | 333           | 11.3  |
| 1277          | 333.8  | 292           | 4.1   |
| 1215          | 121.6  | 276           | 18.7  |
| 1181          | 50.7   | 189           | 0.9   |
| 1171          | 0.8    | 166           | 1.4   |
| 1130          | 77.5   | 135           | 0.4   |
| 1087          | 68.7   | 109           | 2.1   |
| 1023          | 94.0   | 100           | 3.8   |
| 907           | 1.0    | 74            | 4.0   |
| 895           | 39.3   | 56            | 0.4   |

| $\tilde{\nu}$ | $A$    | $\tilde{\nu}$ | $A$   |
|---------------|--------|---------------|-------|
| 3595          | 123.4  | 850           | 483.3 |
| 3249          | 0.1    | 825           | 56.5  |
| 3230          | 1.4    | 802           | 7.0   |
| 3153          | 15.8   | 759           | 13.2  |
| 3120          | 19.3   | 708           | 40.9  |
| 3049          | 40.8   | 699           | 21.8  |
| 2250          | 1651.4 | 645           | 14.1  |
| 1773          | 272.0  | 597           | 13.5  |
| 1592          | 165.1  | 552           | 4.5   |
| 1520          | 15.7   | 546           | 38.0  |
| 1499          | 11.5   | 502           | 8.9   |
| 1482          | 9.2    | 446           | 6.4   |
| 1470          | 29.5   | 408           | 78.5  |
| 1418          | 126.1  | 367           | 5.6   |
| 1393          | 15.3   | 338           | 19.1  |
| 1265          | 331.6  | 272           | 3.5   |
| 1210          | 133.1  | 263           | 17.0  |
| 1172          | 116.3  | 186           | 7.3   |
| 1171          | 0.8    | 151           | 2.6   |
| 1129          | 85.1   | 131           | 0.2   |
| 1084          | 38.7   | 101           | 1.4   |
| 1020          | 63.9   | 79            | 0.3   |
| 911           | 1.8    | 39            | 8.1   |
| 887           | 86.5   | 35            | 3.4   |

### Conformer 17-III

Energy = -928.6423357 Ha, ZPE = 0.1229846 Ha

|   |              |              |              |
|---|--------------|--------------|--------------|
| C | 0.814572000  | 0.622060000  | -0.046437000 |
| C | 0.504764000  | -0.730500000 | 0.021783000  |
| C | 1.677343000  | -1.549073000 | 0.083456000  |
| C | 2.837792000  | -0.842443000 | 0.059035000  |
| S | 2.546740000  | 0.864303000  | -0.048098000 |
| H | 1.617622000  | -2.626685000 | 0.141737000  |
| H | 3.849946000  | -1.214082000 | 0.096887000  |
| N | 0.062613000  | 1.762145000  | -0.141296000 |
| C | -1.082057000 | 2.127826000  | 0.049073000  |
| N | -2.196467000 | 2.620747000  | 0.062959000  |
| H | -2.571971000 | 3.057603000  | 0.894654000  |
| C | -0.828900000 | -1.361292000 | 0.014399000  |
| O | -1.014931000 | -2.556550000 | 0.064693000  |
| O | -1.829014000 | -0.457966000 | -0.060063000 |
| C | -3.167957000 | -0.984923000 | -0.100673000 |
| H | -3.814059000 | -0.113927000 | -0.180918000 |
| H | -3.382586000 | -1.546891000 | 0.809293000  |
| H | -3.291585000 | -1.638904000 | -0.964583000 |

| $\tilde{\nu}$ | $A$    | $\tilde{\nu}$ | $A$   |
|---------------|--------|---------------|-------|
| 3600          | 109.3  | 853           | 346.5 |
| 3249          | 0.3    | 838           | 124.9 |
| 3222          | 2.3    | 800           | 3.4   |
| 3162          | 7.3    | 775           | 17.8  |
| 3125          | 17.5   | 720           | 10.8  |
| 3052          | 33.1   | 710           | 68.3  |
| 2252          | 1522.8 | 613           | 12.4  |
| 1758          | 425.5  | 595           | 8.1   |
| 1578          | 60.3   | 543           | 21.1  |
| 1524          | 21.4   | 530           | 2.1   |
| 1498          | 7.9    | 500           | 22.7  |
| 1485          | 8.5    | 442           | 2.6   |
| 1471          | 58.3   | 389           | 81.5  |
| 1419          | 113.4  | 356           | 6.6   |
| 1393          | 2.4    | 323           | 1.0   |
| 1283          | 248.7  | 304           | 14.1  |
| 1213          | 38.0   | 258           | 31.3  |
| 1172          | 1.0    | 187           | 5.3   |
| 1169          | 77.6   | 164           | 9.8   |
| 1120          | 35.4   | 136           | 0.2   |
| 1073          | 31.5   | 109           | 0.1   |
| 994           | 53.9   | 103           | 1.6   |
| 920           | 35.1   | 54            | 9.7   |
| 917           | 2.2    | 34            | 3.7   |

### Conformer 17-IV

Energy = -928.6411317 Ha, ZPE = 0.1229499 Ha

|   |              |              |              |
|---|--------------|--------------|--------------|
| C | -0.715039000 | -0.083366000 | -0.007189000 |
| C | 0.476989000  | -0.786486000 | 0.001958000  |
| C | 0.270053000  | -2.203317000 | 0.011730000  |
| C | -1.039102000 | -2.563980000 | 0.010448000  |
| S | -2.089162000 | -1.179334000 | -0.005802000 |
| H | 1.095395000  | -2.900718000 | 0.019153000  |
| H | -1.463732000 | -3.555906000 | 0.015064000  |
| N | -0.878481000 | 1.277567000  | -0.025177000 |
| C | -1.844196000 | 2.017469000  | 0.018006000  |
| N | -2.732627000 | 2.844111000  | -0.103765000 |
| H | -3.161950000 | 3.287085000  | 0.698943000  |
| C | 1.858193000  | -0.251364000 | 0.001650000  |
| O | 2.840208000  | -0.962676000 | -0.002978000 |
| O | 1.918949000  | 1.091697000  | 0.008120000  |
| C | 3.241135000  | 1.658687000  | 0.000801000  |
| H | 3.090932000  | 2.736003000  | 0.003631000  |
| H | 3.785231000  | 1.348422000  | -0.892340000 |
| H | 3.797016000  | 1.344689000  | 0.885415000  |

| $\tilde{\nu}$ | $A$    | $\tilde{\nu}$ | $A$   |
|---------------|--------|---------------|-------|
| 3591          | 113.1  | 853           | 495.5 |
| 3248          | 0.3    | 833           | 44.3  |
| 3225          | 2.3    | 804           | 3.9   |
| 3156          | 12.2   | 764           | 17.8  |
| 3121          | 19.0   | 710           | 67.8  |
| 3049          | 38.2   | 704           | 0.9   |
| 2244          | 1568.5 | 650           | 22.3  |
| 1747          | 459.2  | 596           | 9.8   |
| 1591          | 100.2  | 548           | 38.6  |
| 1519          | 19.6   | 534           | 5.6   |
| 1497          | 6.1    | 502           | 13.7  |
| 1482          | 8.9    | 457           | 1.4   |
| 1471          | 57.2   | 408           | 68.7  |
| 1414          | 135.5  | 355           | 14.8  |
| 1405          | 15.4   | 346           | 2.1   |
| 1289          | 361.3  | 280           | 4.8   |
| 1212          | 47.5   | 269           | 17.7  |
| 1169          | 85.9   | 180           | 5.7   |
| 1169          | 4.5    | 148           | 3.8   |
| 1124          | 30.8   | 134           | 0.0   |
| 1082          | 17.9   | 101           | 1.4   |
| 995           | 45.7   | 76            | 0.3   |
| 924           | 2.1    | 43            | 8.9   |
| 915           | 23.4   | 32            | 3.1   |
